# Supplementary material for: Weight-for-height and mid-upper-arm circumference should be used independently to diagnose acute malnutrition: policy implications
Source: Springer Nature journal article supplement (doi:10.1186/s40795-016-0049-7), 2016-02-05
Supplement: MOESM1 [file 25668610]

**Table S1: The numbers of children with plausible data without oedema in each country (WHO flags), those remaining after applying SMART flags and the number of oedematous children deleted**

| **Country** | **Surveys** | **Subjects using WHO flags** | **Subjects using SMART flags** | ***% flagged*** | ***Excluded for oedema %*** |
| --- | --- | --- | --- | --- | --- |
| Guatemala | 2 | 1 424 | 1 393 | *2.2* | *0.14* |
| Tajikistan | 5 | 4 628 | 4 446 | *3.9* | *2.40* |
| Malawi | 34 | 20 525 | 20 014 | *2.5* | *1.14* |
| Mozambique | 14 | 3 908 | 3 828 | *2.0* | *2.36* |
| Rwanda | 22 | 12 191 | 11 968 | *1.8* | *1.28* |
| Afghanistan | 55 | 47 008 | 46 217 | *1.7* | *0.17* |
| Angola | 45 | 38 344 | 37 610 | *1.9* | *0.79* |
| Burundi | 32 | 21 064 | 20 729 | *1.6* | *1.40* |
| Sierra Leone | 71 | 57 658 | 56 482 | *2.0* | *0.42* |
| Zambia | 6 | 3 495 | 3 447 | *1.4* | *0.00* |
| Uganda | 83 | 52 221 | 51 526 | *1.3* | *0.34* |
| Tanzania | 13 | 6 878 | 6 735 | *2.1* | *1.40* |
| Madagascar | 6 | 4 141 | 4 092 | *1.2* | *0.44* |
| Ivory Coast | 6 | 7 704 | 7 593 | *1.4* | *0.75* |
| DRC | 208 | 183 354 | 180 795 | *1.4* | *1.12* |
| Liberia | 76 | 51 307 | 50 409 | *1.8* | *0.59* |
| Haiti | 45 | 36 082 | 35 675 | *1.1* | *0.41* |
| Eritrea | 2 | 1 624 | 1 597 | *1.7* | *0.31* |
| CAR | 49 | 37 016 | 36 527 | *1.3* | *0.60* |
| Myanmar | 15 | 11 226 | 11 144 | *0.7* | *0.17* |
| Guinea | 17 | 12 913 | 12 691 | *1.7* | *0.20* |
| Pakistan | 27 | 24 788 | 24 494 | *1.2* | *0.13* |
| Nepal | 7 | 4 348 | 4 313 | *0.8* | *0.44* |
| Nigeria | 45 | 30 291 | 29 769 | *1.7* | *0.11* |
| Zimbabwe | 3 | 1 361 | 1 332 | *2.1* | *0.00* |
| Ethiopia | 73 | 64 440 | 63 858 | *0.9* | *0.23* |
| Niger | 38 | 47 238 | 46 784 | *1.0* | *0.09* |
| Bangladesh | 30 | 18 403 | 18 304 | *0.5* | *0.10* |
| Somalia | 102 | 78 208 | 75 717 | *3.2* | *0.80* |
| Chad | 128 | 91 511 | 90 615 | *1.0* | *0.29* |
| Timor | 3 | 1 687 | 1 673 | *0.8* | *0.00* |
| Cameroun | 9 | 6 028 | 5 938 | *1.5* | *0.17* |
| South Sudan | 198 | 142 587 | 140 046 | *1.8* | *0.39* |
| Benin | 7 | 7 896 | 7 823 | *0.9* | *0.06* |
| India | 9 | 5 704 | 5 649 | *1.0* | *0.15* |
| Sudan | 86 | 72 608 | 71 796 | *1.1* | *0.15* |
| Burkina Faso | 67 | 41 530 | 41 244 | *0.7* | *0.11* |
| Mali | 15 | 19 976 | 19 668 | *1.5* | *0.27* |
| Mauritania | 51 | 40 740 | 40 434 | *0.8* | *0.09* |
| Guinea-Bissau | 4 | 2 436 | 2 414 | *0.9* | *0.08* |
| Togo | 14 | 6 544 | 6 502 | *0.6* | *0.57* |
| Thailand | 2 | 1 810 | 1 797 | *0.7* | *0.00* |
| Kenya | 49 | 33 680 | 33 445 | *0.7* | *0.31* |
| Gambia | 8 | 6 788 | 6 730 | *0.9* | *0.04* |
| Philippines | 7 | 3 934 | 3 905 | *0.7* | *0.00* |
| Sri Lanka | 5 | 4 599 | 4 576 | *0.5* | *0.02* |
| Senegal | 39 | 30 523 | 30 324 | *0.7* | *0.09* |
| 47 | 1 832 | 1 404 369 | 1 384 068 | *1.4±0.7* | *0.49%* |
| **Additional surveys with number of GAM children <75** | | | |  |  |
| Indonesia | 1 | 394 | 371 | *5.8* | *0.00* |
| Congo-B | 1 | 878 | 870 | *0.9* | *0.46* |
| Nicaragua | 2 | 969 | 962 | *0.7* | *0.83* |
| Albania | 1 | 906 | 892 | *1.5* | *0.00* |
| Macedonia | 1 | 861 | 845 | *1.9* | *0.00* |
| Kosovar | 1 | 920 | 912 | *0.9* | *0.00* |
| Venezuela | 3 | 1 774 | 1771 | *0.2* | *0.17* |
| Syria | 1 | 531 | 522 | *1.7* | *0.00* |

DRC = Democratic Republic of Congo; CAR = Central African Republic; Congo-B = Congo Brazzaville.

**Table S2: The diagnosis of GAM by WHZ, absolute-MUAC or by both criteria 47 countries with more than 75 GAM children and from 11 other countries for all children with plausible data and no oedema (i.e. with WHO flags), and the percent difference between the results when applying WHO and SMART flags (in italics). The data are presented as percent of the total number of GAM children fulfilling either WHZ or MUAC criteria.**

| **GAM analysis with WHO flags** | | | | | | | | **Percent difference between analysis using SMART & WHO flags** | | | | | | |
| --- | --- | --- | --- | --- | --- | --- | --- | --- | --- | --- | --- | --- | --- | --- |
| **Country** | **GAM subjects** | **WHZ<-2 only** | **MUAC<125 mm only** | **Both criteria** | **%WHZ-only minus %MUAC-only** | **Total WHZ<-2** | **Total MUAC <125 mm** | ***GAM subjects %*** | ***WHZ<-2 only %*** | ***MUAC<125 mm only %*** | ***Both criteria %*** | ***%WHZ minus %MUAC*** | ***Total WHZ<-2 %*** | ***Total MUAC <125 mm %*** |
| Guatemala | 97 | 18.6 | 58.8 | 22.7 | **-40.2** | 41.2 | 81.4 | *20.6* | *5.6* | *11.4* | *5.8* | *16.9* | *11.4* | *5.6* |
| Tajikistan | 988 | 19.1 | 49.9 | 31.0 | **-30.8** | 50.1 | 80.9 | *14.7* | *2.0* | *7.3* | *5.2* | *9.3* | *7.3* | *2.0* |
| Malawi | 2 729 | 21.5 | 52.8 | 25.7 | **-31.3** | 47.2 | 78.5 | *14.1* | *1.1* | *6.7* | *5.6* | *7.7* | *6.7* | *1.1* |
| Mozambique | 627 | 21.4 | 41.0 | 37.6 | **-19.6** | 59.0 | 78.6 | *8.8* | *0.4* | *2.9* | *2.5* | *3.3* | *2.9* | *0.4* |
| Rwanda | 2 043 | 21.8 | 41.5 | 36.7 | **-19.7** | 58.5 | 78.2 | *7.9* | *0.1* | *3.3* | *3.2* | *3.4* | *3.3* | *0.1* |
| Afghanistan | 8 138 | 23.0 | 41.3 | 35.7 | **-18.3** | 58.7 | 77.0 | *6.3* | *0.4* | *2.4* | *2.0* | *2.8* | *2.4* | *0.4* |
| Angola | 6 595 | 23.2 | 42.6 | 34.3 | **-19.4** | 57.4 | 76.8 | *8.2* | *0.3* | *3.0* | *3.4* | *2.7* | *3.0* | *0.3* |
| Burundi | 3 475 | 23.3 | 43.1 | 33.6 | **-19.9** | 56.9 | 76.7 | *6.8* | *0.3* | *2.4* | *2.7* | *2.1* | *2.4* | *0.3* |
| Sierra Leone | 10 351 | 22.9 | 35.3 | 41.7 | **-12.4** | 64.7 | 77.1 | *8.5* | *0.8* | *2.4* | *3.2* | *1.7* | *2.4* | *0.8* |
| Zambia | 296 | 27.4 | 44.6 | 28.0 | **-17.2** | 55.4 | 72.6 | *15.2* | *3.5* | *7.6* | *4.1* | *11.1* | *7.6* | *3.5* |
| Uganda | 6 317 | 24.1 | 42.8 | 33.1 | **-18.6** | 57.2 | 75.9 | *8.3* | *0.3* | *3.4* | *3.7* | *3.1* | *3.4* | *0.3* |
| Tanzania | 1 119 | 24.7 | 35.0 | 40.3 | **-10.4** | 65.0 | 75.3 | *7.6* | *1.3* | *2.4* | *3.7* | *1.1* | *2.4* | *1.3* |
| Madagascar | 774 | 28.9 | 33.7 | 37.3 | **-4.8** | 66.3 | 71.1 | *4.1* | *0.6* | *1.5* | *2.0* | *0.9* | *1.5* | *0.6* |
| Ivory Coast | 728 | 28.8 | 32.8 | 38.3 | **-4.0** | 67.2 | 71.2 | *11.5* | *2.1* | *3.8* | *5.9* | *1.8* | *3.8* | *2.1* |
| DRC | 25 341 | 32.0 | 40.8 | 27.2 | **-8.8** | 59.2 | 68.0 | *7.6* | *0.7* | *1.9* | *2.6* | *1.3* | *1.9* | *0.7* |
| Liberia | 6 960 | 32.4 | 30.8 | 36.8 | **1.6** | 69.2 | 67.6 | *9.6* | *1.0* | *2.7* | *3.7* | *1.7* | *2.7* | *1.0* |
| Haiti | 2 674 | 32.7 | 37.5 | 29.8 | **-4.8** | 62.5 | 67.3 | *9.7* | *1.1* | *2.9* | *4.0* | *1.9* | *2.9* | *1.1* |
| Eritrea | 293 | 33.8 | 40.3 | 25.9 | **-6.5** | 59.7 | 66.2 | *6.1* | *0.0* | *1.9* | *1.9* | *1.9* | *1.9* | *0.0* |
| CAR | 4 039 | 32.8 | 36.7 | 30.5 | **-3.9** | 63.3 | 67.2 | *9.0* | *1.0* | *2.7* | *3.7* | *1.7* | *2.7* | *1.0* |
| Myanmar | 2 388 | 33.9 | 29.9 | 36.2 | **4.0** | 70.1 | 66.1 | *2.7* | *0.7* | *0.6* | *1.4* | *0.1* | *0.6* | *0.7* |
| Guinea | 1 151 | 34.9 | 31.1 | 34.0 | **3.8** | 68.9 | 65.1 | *11.9* | *1.1* | *3.5* | *4.6* | *2.4* | *3.5* | *1.1* |
| Pakistan | 3 999 | 36.1 | 33.6 | 30.3 | **2.6** | 66.4 | 63.9 | *5.8* | *0.7* | *1.6* | *2.3* | *0.9* | *1.6* | *0.7* |
| Nepal | 1 107 | 38.8 | 26.2 | 35.0 | **12.6** | 73.8 | 61.2 | *2.3* | *0.5* | *0.4* | *0.9* | *0.1* | *0.4* | *0.5* |
| Nigeria | 4 225 | 38.6 | 27.0 | 34.4 | **11.6** | 73.0 | 61.4 | *8.7* | *1.5* | *2.1* | *3.6* | *0.6* | *2.1* | *1.5* |
| Zimbabwe | 150 | 40.7 | 29.3 | 30.0 | **11.3** | 70.7 | 59.3 | *14.7* | *0.7* | *3.5* | *4.2* | *2.7* | *3.5* | *0.7* |
| Ethiopia | 11 231 | 41.3 | 29.7 | 28.9 | **11.6** | 70.3 | 58.7 | *3.1* | *0.5* | *0.6* | *1.1* | *0.1* | *0.6* | *0.5* |
| Niger | 8 257 | 43.5 | 21.0 | 35.4 | **22.5** | 79.0 | 56.5 | *3.6* | *1.2* | *0.6* | *1.8* | *0.6* | *0.6* | *1.2* |
| Bangladesh | 3 373 | 46.6 | 24.9 | 28.5 | **21.7** | 75.1 | 53.4 | *1.5* | *0.2* | *0.3* | *0.5* | *0.2* | *0.3* | *0.2* |
| Somalia | 20 904 | 47.3 | 26.4 | 26.3 | **20.8** | 73.6 | 52.7 | *6.5* | *1.3* | *0.1* | *1.2* | *1.4* | *0.1* | *1.3* |
| Chad | 18 150 | 49.9 | 18.2 | 31.9 | **31.7** | 81.8 | 50.1 | *3.1* | *1.0* | *0.4* | *1.5* | *0.6* | *0.4* | *1.0* |
| Timor | 292 | 51.0 | 20.5 | 28.4 | **30.5** | 79.5 | 49.0 | *2.4* | *0.2* | *0.2* | *0.4* | *0.0* | *0.2* | *0.2* |
| Cameroun | 632 | 50.3 | 16.9 | 32.8 | **33.4** | 83.1 | 49.7 | *9.8* | *2.5* | *1.8* | *4.3* | *0.6* | *1.8* | *2.5* |
| South Sudan | 35 335 | 51.4 | 18.4 | 30.2 | **33.1** | 81.6 | 48.6 | *4.4* | *1.4* | *0.1* | *1.3* | *1.6* | *0.1* | *1.4* |
| Benin | 705 | 51.5 | 19.0 | 29.5 | **32.5** | 81.0 | 48.5 | *7.5* | *2.2* | *0.5* | *2.7* | *1.7* | *0.5* | *2.2* |
| India | 1 524 | 54.5 | 11.6 | 33.9 | **42.8** | 88.4 | 45.5 | *1.7* | *0.5* | *0.1* | *0.5* | *0.4* | *0.1* | *0.5* |
| Sudan | 15 775 | 54.3 | 15.1 | 30.6 | **39.1** | 84.9 | 45.7 | *2.8* | *0.8* | *0.1* | *0.9* | *0.7* | *0.1* | *0.8* |
| Burkina Faso | 5 373 | 54.3 | 14.6 | 31.0 | **39.7** | 85.4 | 45.7 | *3.7* | *1.5* | *0.5* | *2.0* | *1.0* | *0.5* | *1.5* |
| Mali | 2 818 | 55.5 | 16.3 | 28.2 | **39.2** | 83.7 | 44.5 | *6.8* | *1.6* | *0.9* | *2.5* | *0.6* | *0.9* | *1.6* |
| Mauritania | 5 022 | 58.7 | 22.1 | 19.3 | **36.6** | 77.9 | 41.3 | *3.4* | *0.8* | *0.1* | *0.9* | *0.6* | *0.1* | *0.8* |
| Guinea-Bissau | 158 | 58.9 | 19.0 | 22.2 | **39.9** | 81.0 | 41.1 | *7.0* | *1.7* | *0.1* | *1.7* | *1.6* | *0.1* | *1.7* |
| Togo | 459 | 63.4 | 13.1 | 23.5 | **50.3** | 86.9 | 36.6 | *5.9* | *1.6* | *0.6* | *2.2* | *1.1* | *0.6* | *1.6* |
| Thailand | 138 | 71.7 | 10.1 | 18.1 | **61.6** | 89.9 | 28.3 | *6.5* | *0.4* | *0.7* | *1.1* | *0.4* | *0.7* | *0.4* |
| Kenya | 6 781 | 72.3 | 11.2 | 16.5 | **61.1** | 88.8 | 27.7 | *1.8* | *0.6* | *0.1* | *0.5* | *0.6* | *0.1* | *0.6* |
| Gambia | 772 | 72.0 | 7.3 | 20.7 | **64.8** | 92.7 | 28.0 | *4.4* | *1.7* | *0.1* | *1.6* | *1.8* | *0.1* | *1.7* |
| Philippines | 339 | 75.5 | 7.4 | 17.1 | **68.1** | 92.6 | 24.5 | *4.1* | *1.1* | *0.0* | *1.1* | *1.1* | *0.0* | *1.1* |
| Sri Lanka | 884 | 76.5 | 7.8 | 15.7 | **68.7** | 92.2 | 23.5 | *1.2* | *0.7* | *0.0* | *0.7* | *0.8* | *0.0* | *0.7* |
| Senegal | 3 748 | 77.0 | 6.9 | 16.1 | **70.1** | 93.1 | 23.0 | *2.7* | *1.3* | *0.1* | *1.2* | *1.5* | *0.1* | *1.3* |
| **Total/%*** | **239 274** | **42.6** | **27.1** | **30.3** | **15.5** | **57.4** | **42.6** | ***5.6*** | ***1.2*** | ***0.9*** | ***2.0*** | ***0.3*** | ***1.2*** | ***1.2*** |
| Mean±SD** | del | 42.4±17.4 | 28±13.3 | 29.6±6.7 | 26.8±19.8 | 72±13.3 | 57.6±17.4 | *6.9±4.2* | *1.1±1* | *2±2.3* | *2.5±1.5* | *2.2±3.1* | *2±2.3* | *1.1±1* |
| **Countries with total number of GAM children in surveys <75** | | | | | | | |  |  |  |  |  |  |  |
| Indonesia | 82 | 26.8 | 46.3 | 26.8 | **-19.5** | 53.7 | 73.2 | *9.8* | *0.2* | *5.0* | *5.2* | *4.8* | *5.0* | *0.2* |
| Congo-B | 52 | 48.1 | 15.4 | 36.5 | **32.7** | 84.6 | 51.9 | *9.6* | *0.9* | *1.6* | *2.5* | *0.8* | *1.6* | *0.9* |
| Nicaragua | 19 | 47.4 | 31.6 | 21.1 | **15.8** | 68.4 | 52.6 | *21.1* | *6.0* | *8.4* | *14.4* | *2.5* | *8.4* | *6.0* |
| Albania | 50 | 60.0 | 18.0 | 22.0 | **42.0** | 82.0 | 40.0 | *14.0* | *4.2* | *0.6* | *3.6* | *4.8* | *0.6* | *4.2* |
| Macedonia | 23 | 60.9 | 30.4 | 8.7 | **30.4** | 69.6 | 39.1 | *30.4* | *4.6* | *7.1* | *2.4* | *11.7* | *7.1* | *4.6* |
| Kosovar | 19 | 63.2 | 15.8 | 21.1 | **47.4** | 84.2 | 36.8 | *26.3* | *6.0* | *5.6* | *0.4* | *11.7* | *5.6* | *6.0* |
| Venezuela | 20 | 60.0 | 25.0 | 15.0 | **35.0** | 75.0 | 40.0 | *10.0* | *1.1* | *2.8* | *3.9* | *1.7* | *2.8* | *1.1* |
| Syria | 32 | 68.8 | 18.8 | 12.5 | **50.0** | 81.3 | 31.3 | *21.9* | *3.3* | *2.8* | *0.5* | *6.0* | *2.8* | *3.3* |

* Total children with GAM and percent of all children in the database with that characteristic

** The mean and SD of the 47 countries

† calculated using absolute numbers.

DRC = Democratic Republic of Congo; CAR = Central African Republic; Congo-B = Congo Brazzaville

**Table S3: The diagnosis of SAM by WHZ, absolute-MUAC or by both criteria 38 countries with more than 75 GAM children and from 9 other countries for all children with plausible data and no oedema (i.e. with WHO flags), and the percent difference between the results when applying WHO and SMART flags (in italics). The data are presented as percent of the total number of SAM children fulfilling either WHZ or MUAC criteria.**

| **SAM analysis with WHO Flags** | | | | | | | | **Percent difference between analysis using SMART and WHO Flags** | | | | | | |
| --- | --- | --- | --- | --- | --- | --- | --- | --- | --- | --- | --- | --- | --- | --- |
| **Country** | **SAM subjects** | **WHZ<-3 only** | **MUAC<115 mm only** | **Both criteria** | **%WHZ-only minus %MUAC-only** | **Total WHZ<-3** | **Total MUAC <115 mm** | **SAM subjects %** | **WHZ<-3 only %** | **MUAC<115 mm only %** | **Both criteria %** | **%WHZ minus %MUAC** | **Total WHZ<-3 %** | **Total MUAC <115 mm %** |
| Mozambique | 222 | 22.1 | 44.6 | 33.3 | **-22.5** | 55.4 | 77.9 | *23.0* | *3.4* | *6.9* | *3.5* | *10.2* | *6.9* | *3.4* |
| Malawi | 860 | 29.4 | 50.9 | 19.7 | **-21.5** | 49.1 | 70.6 | *42.7* | *10.1* | *22.5* | *12.3* | *32.6* | *22.5* | *10.1* |
| Tajikistan | 369 | 29.5 | 45.3 | 25.2 | **-15.7** | 54.7 | 70.5 | *38.8* | *10.1* | *22.4* | *12.4* | *32.5* | *22.4* | *10.1* |
| Ivory Coast | 190 | 24.7 | 40.0 | 35.3 | **-15.3** | 60.0 | 75.3 | *44.2* | *0.7* | *22.3* | *23.0* | *21.5* | *22.3* | *0.7* |
| Uganda | 1 544 | 28.9 | 47.4 | 23.7 | **-18.5** | 52.6 | 71.1 | *33.2* | *3.4* | *16.3* | *12.9* | *19.7* | *16.3* | *3.4* |
| Rwanda | 648 | 29.3 | 41.0 | 29.6 | **-11.7** | 59.0 | 70.7 | *24.2* | *3.3* | *10.3* | *7.0* | *13.5* | *10.3* | *3.3* |
| Burundi | 962 | 26.9 | 48.5 | 24.5 | **-21.6** | 51.5 | 73.1 | *23.7* | *0.6* | *9.4* | *8.7* | *10.0* | *9.4* | *0.6* |
| Sierra Leone | 3 421 | 26.5 | 42.0 | 31.5 | **-15.5** | 58.0 | 73.5 | *24.4* | *0.2* | *9.4* | *9.2* | *9.5* | *9.4* | *0.2* |
| Haiti | 579 | 33.7 | 43.0 | 23.3 | **-9.3** | 57.0 | 66.3 | *43.2* | *6.3* | *17.5* | *11.2* | *23.8* | *17.5* | *6.3* |
| Afghanistan | 2 228 | 30.4 | 42.1 | 27.5 | **-11.8** | 57.9 | 69.6 | *22.4* | *2.9* | *10.0* | *7.1* | *12.9* | *10.0* | *2.9* |
| Madagascar | 195 | 27.2 | 46.7 | 26.2 | **-19.5** | 53.3 | 72.8 | *16.4* | *1.0* | *7.9* | *9.0* | *6.9* | *7.9* | *1.0* |
| Angola | 1 985 | 30.3 | 45.5 | 24.2 | **-15.3** | 54.5 | 69.7 | *26.6* | *1.6* | *10.5* | *8.9* | *12.1* | *10.5* | *1.6* |
| Guinea | 287 | 37.6 | 35.2 | 27.2 | **2.4** | 64.8 | 62.4 | *44.9* | *8.5* | *18.6* | *10.1* | *27.1* | *18.6* | *8.5* |
| CAR | 974 | 33.2 | 43.9 | 22.9 | **-10.8** | 56.1 | 66.8 | *36.1* | *2.0* | *12.3* | *10.4* | *14.3* | *12.3* | *2.0* |
| DRC | 6 538 | 35.7 | 48.8 | 15.5 | **-13.2** | 51.2 | 64.3 | *28.4* | *0.8* | *6.6* | *5.8* | *7.4* | *6.6* | *0.8* |
| Tanzania | 339 | 32.2 | 36.6 | 31.3 | **-4.4** | 63.4 | 67.8 | *24.8* | *3.5* | *6.2* | *9.7* | *2.6* | *6.2* | *3.5* |
| Pakistan | 1 022 | 36.6 | 36.7 | 26.7 | **-0.1** | 63.3 | 63.4 | *22.2* | *0.4* | *7.0* | *7.3* | *6.6* | *7.0* | *0.4* |
| Liberia | 2 035 | 39.1 | 35.2 | 25.7 | **3.8** | 64.8 | 60.9 | *32.0* | *0.2* | *10.2* | *10.4* | *10.1* | *10.2* | *0.2* |
| Myanmar | 552 | 38.8 | 34.1 | 27.2 | **4.7** | 65.9 | 61.2 | *11.4* | *1.7* | *3.4* | *5.1* | *1.6* | *3.4* | *1.7* |
| Nepal | 263 | 43.3 | 34.2 | 22.4 | **9.1** | 65.8 | 56.7 | *9.5* | *0.1* | *2.3* | *2.3* | *2.4* | *2.3* | *0.1* |
| Ethiopia | 2 307 | 42.7 | 37.1 | 20.2 | **5.6** | 62.9 | 57.3 | *14.5* | *0.6* | *3.9* | *4.5* | *3.3* | *3.9* | *0.6* |
| Bangladesh | 582 | 46.6 | 39.2 | 14.3 | **7.4** | 60.8 | 53.4 | *8.6* | *1.8* | *3.3* | *1.5* | *5.1* | *3.3* | *1.8* |
| Niger | 1 821 | 46.6 | 22.2 | 31.2 | **24.4** | 77.8 | 53.4 | *15.6* | *4.2* | *3.2* | *7.4* | *1.0* | *3.2* | *4.2* |
| Nigeria | 1 123 | 47.4 | 24.5 | 28.1 | **22.9** | 75.5 | 52.6 | *32.0* | *3.7* | *7.7* | *11.4* | *4.0* | *7.7* | *3.7* |
| Chad | 4 370 | 50.2 | 23.4 | 26.5 | **26.8** | 76.6 | 49.8 | *12.7* | *1.7* | *2.4* | *4.2* | *0.7* | *2.4* | *1.7* |
| South Sudan | 9 708 | 53.6 | 24.9 | 21.5 | **28.7** | 75.1 | 46.4 | *14.6* | *3.6* | *0.7* | *4.3* | *3.0* | *0.7* | *3.6* |
| Somalia | 6 751 | 55.5 | 28.5 | 16.0 | **27.1** | 71.5 | 44.5 | *17.9* | *1.9* | *0.5* | *2.4* | *1.4* | *0.5* | *1.9* |
| Benin | 145 | 54.5 | 20.0 | 25.5 | **34.5** | 80.0 | 45.5 | *34.5* | *3.4* | *4.2* | *7.6* | *0.8* | *4.2* | *3.4* |
| Burkina Faso | 1 113 | 54.7 | 20.0 | 25.2 | **34.7** | 80.0 | 45.3 | *17.7* | *4.0* | *3.0* | *7.0* | *1.0* | *3.0* | *4.0* |
| Cameroun | 152 | 55.3 | 17.8 | 27.0 | **37.5** | 82.2 | 44.7 | *40.8* | *4.7* | *8.9* | *13.6* | *4.2* | *8.9* | *4.7* |
| Sudan | 3 738 | 58.2 | 18.2 | 23.7 | **40.0** | 81.8 | 41.8 | *11.4* | *2.3* | *1.0* | *3.3* | *1.3* | *1.0* | *2.3* |
| Mauritania | 837 | 58.8 | 26.2 | 15.1 | **32.6** | 73.8 | 41.2 | *19.4* | *2.7* | *1.4* | *4.1* | *1.3* | *1.4* | *2.7* |
| India | 364 | 61.3 | 14.8 | 23.9 | **46.4** | 85.2 | 38.7 | *6.3* | *0.3* | *0.7* | *1.0* | *0.4* | *0.7* | *0.3* |
| Mali | 640 | 59.1 | 18.4 | 22.5 | **40.6** | 81.6 | 40.9 | *29.8* | *3.5* | *4.9* | *8.5* | *1.4* | *4.9* | *3.5* |
| Kenya | 1 275 | 75.7 | 13.6 | 10.7 | **62.1** | 86.4 | 24.3 | *9.3* | *2.0* | *0.7* | *1.3* | *2.7* | *0.7* | *2.0* |
| Gambia | 143 | 76.9 | 9.1 | 14.0 | **67.8** | 90.9 | 23.1 | *21.7* | *1.6* | *1.6* | *3.3* | *0.0* | *1.6* | *1.6* |
| Senegal | 629 | 79.7 | 8.6 | 11.8 | **71.1** | 91.4 | 20.3 | *15.1* | *6.3* | *1.8* | *4.5* | *8.1* | *1.8* | *6.3* |
| Sri Lanka | 126 | 81.7 | 7.9 | 10.3 | **73.8** | 92.1 | 18.3 | *8.7* | *5.2* | *1.0* | *4.2* | *6.2* | *1.0* | *5.2* |
| **Total/%*** | **61 528** | **45.3** | **32.4** | **22.2** | **12.9** | **67.6** | **54.7** | ***20.9*** | ***1.9*** | ***3.9*** | ***5.8*** | ***1.9*** | ***3.9*** | ***1.9*** |
| Mean±SD** | del | 44.6±16.4 | 32±12.9 | 23.4±6.3 | 26.8±19.8 | 68±12.9 | 55.4±16.4 | *23.8±11.3* | *3±2.6* | *7.4±6.5* | *7.4±4.4* | *8.5±9* | *7.4±6.5* | *3±2.6* |
| **Countries with total number of SAM children in surveys <75** | | | | | | | | | | | | | | |
| Guatemala | 34 | 32.4 | 52.9 | 14.7 | **-20.6** | 47.1 | 67.6 | *58.8* | *25.2* | *39.9* | *14.7* | *65.1* | *39.9* | *25.2* |
| Zambia | 89 | 39.3 | 39.3 | 21.3 | **0.0** | 60.7 | 60.7 | *50.6* | *23.4* | *37.9* | *14.5* | *61.4* | *37.9* | *23.4* |
| Timor | 46 | 37.0 | 30.4 | 32.6 | **6.5** | 69.6 | 63.0 | *13.0* | *2.0* | *2.1* | *0.1* | *4.0* | *2.1* | *2.0* |
| Zimbabwe | 59 | 42.4 | 33.9 | 23.7 | **8.5** | 66.1 | 57.6 | *37.3* | *4.5* | *14.8* | *10.2* | *19.3* | *14.8* | *4.5* |
| Eritrea | 62 | 50.0 | 33.9 | 16.1 | **16.1** | 66.1 | 50.0 | *29.0* | *2.3* | *9.3* | *7.0* | *11.6* | *9.3* | *2.3* |
| Guinea-Bissau | 33 | 51.5 | 33.3 | 15.2 | **18.2** | 66.7 | 48.5 | *33.3* | *7.6* | *1.5* | *6.1* | *9.1* | *1.5* | *7.6* |
| Togo | 79 | 57.0 | 29.1 | 13.9 | **27.8** | 70.9 | 43.0 | *34.2* | *4.6* | *3.6* | *8.2* | *1.0* | *3.6* | *4.6* |
| Philippines | 65 | 73.8 | 15.4 | 10.8 | **58.5** | 84.6 | 26.2 | *21.5* | *4.6* | *0.3* | *4.9* | *4.3* | *0.3* | *4.6* |
| Thailand | 24 | 79.2 | 12.5 | 8.3 | **66.7** | 87.5 | 20.8 | *37.5* | *0.8* | *7.5* | *8.3* | *6.7* | *7.5* | *0.8* |

* Total children with GAM and percent of all children in the database with that characteristic

** The mean and SD of the 38 countries

† calculated using absolute numbers.

DRC = Democratic Republic of Congo; CAR = Central African Republic
